# Supplementary material for: Combined Impacts of Nitrous Acid and Nitryl Chloride on LowerTropospheric Ozone: New Module Development in WRF-Chem andApplication to China
Source: Copernicus journal article supplement (doi:10.5194/acp-2017-389), 2017-05-09
Supplement: Supplementary file 1 [file acp-2017-389-supplement.pdf]

Supporting information for:

## Integrated Impacts of Nitrous Acid and Nitryl Chloride on Ozone: New Module Developments for Reactive Nitrogen in WRF-Chem and Applications in summertime over China

Li Zhang <sup>1</sup>, Qinyi Li <sup>1</sup>, Tao Wang <sup>1,\*</sup>, Ravan Ahmadov <sup>2,3</sup>, Qiang Zhang <sup>4</sup>, Meng Li <sup>4</sup>, Mengyao Lv <sup>5</sup>

<sup>1</sup> Department of Civil and Environmental Engineering, The Hong Kong Polytechnic University, Hong Kong, China,

<sup>2</sup> Cooperative Institute for Research in Environmental Sciences, University of Colorado at Boulder, Boulder, CO, USA,

<sup>3</sup> Earth System Research Laboratory, National Oceanic and Atmospheric Administration, Boulder, CO, USA,

<sup>4</sup> Center for Earth System Science, Tsinghua University, Beijing, China,

<sup>5</sup> National Meteorological Center, China Meteorological Administration, Beijing, China

\* Correspondence to: T. Wang (cetwang@polyu.edu.hk)

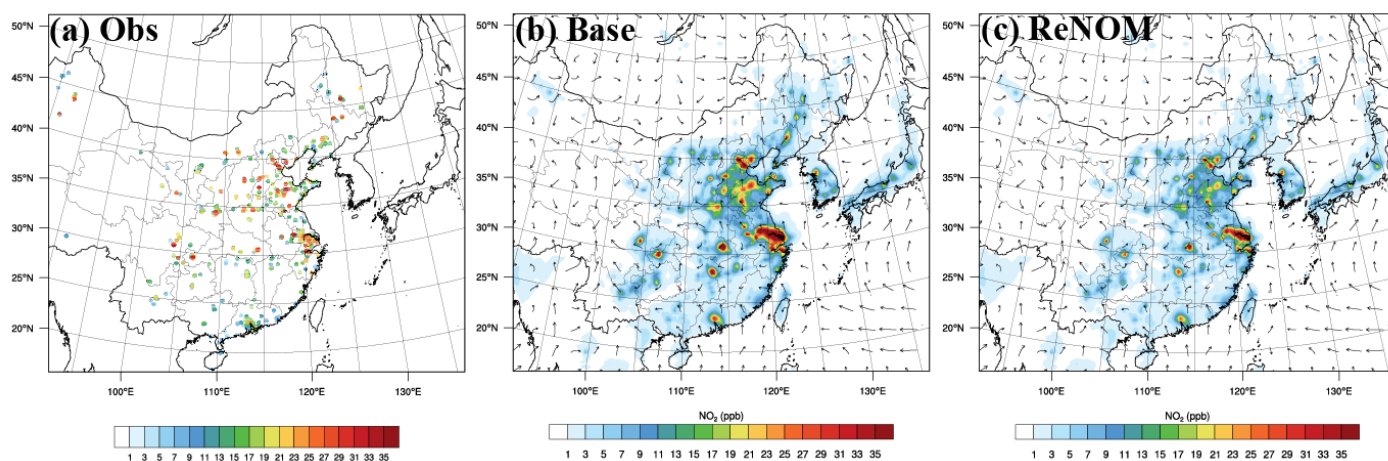

**Figure S1.** Spatial distributions of the (a) observed daily-averaged NO<sub>2</sub> concentration and modeled ones in (b) the Base case and (c) ReNOM case during the simulation period.

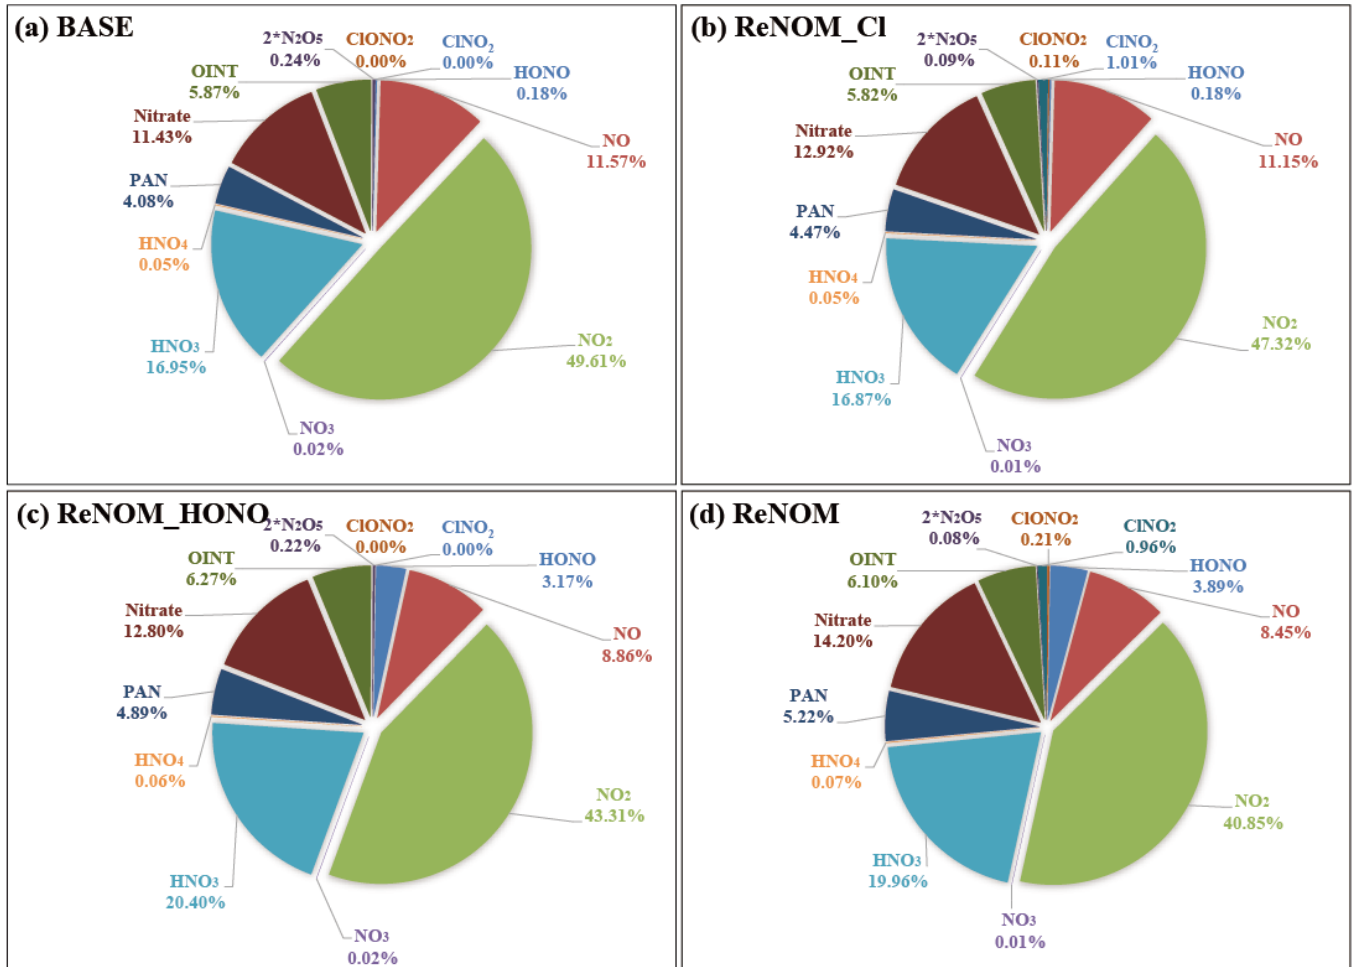

**Figure S2.** Regional averages of NO<sub>y</sub> partitioning over eastern China in (a) BASE case, (b) ReNOM\_Cl case, (c) ReNOM\_HONO case, and (d) ReNOM case.

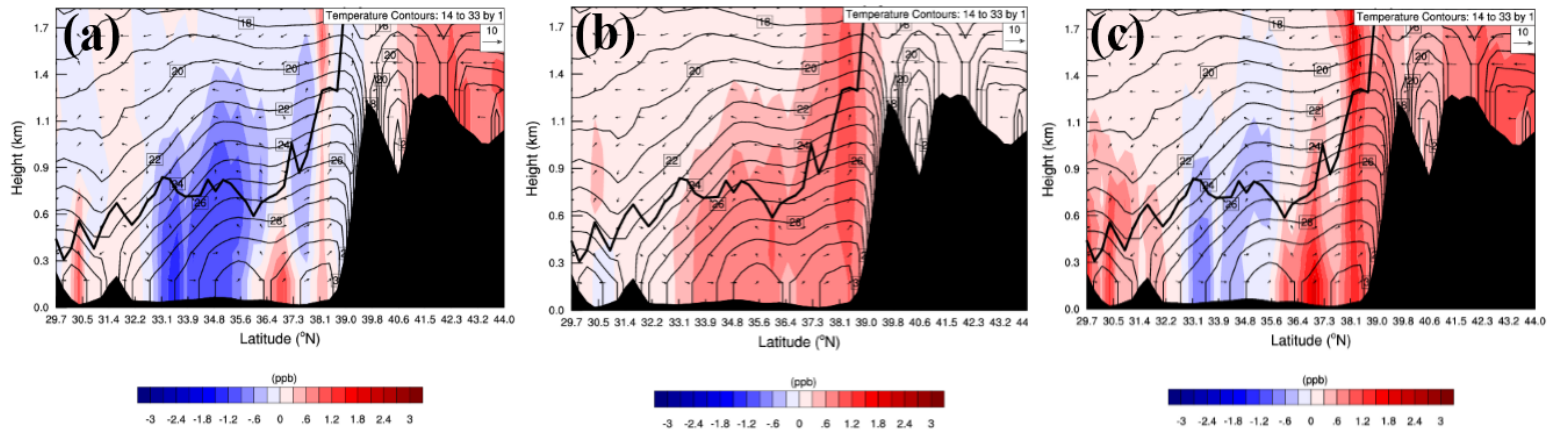

**Figure S3.** Vertical distributions of daytime ozone enhancements in (a) ReNOM\_HONO case, (b) ReNOM\_Cl case, and (c) ReNOM case in the domain intercepting the northern China and central China. Vectors present the average v-w wind components ( $\text{m s}^{-1}$ ), dash lines the temperature ( $^{\circ}\text{C}$ ), and black line the simulated planetary boundary layer height during daytime.
