# Supplementary material for: Combined Impacts of Nitrous Acid and Nitryl Chloride on LowerTropospheric Ozone: New Module Development in WRF-Chem andApplication to China
Source: Copernicus journal article supplement (doi:10.5194/acp-2017-389), 2017-05-09
Supplement: Supplementary file [file acp-2017-389-AC1-supplement.pdf]

## Anonymous Referee #1

Received and published: 23 May 2017

### General comments:

The authors previously expanded the gas-phase CBMZ mechanism in WRF-Chem model to include comprehensive sources of HONO. Here, they update the CMBZ mechanism by incorporating HONO and chlorine chemistry including the heterogeneous ClNO<sub>2</sub> formation. They perform four different model simulations over China for a 12-day period using a 27-km horizontal grid resolution, describe impact of the chemistry, compare model results with observed data and suggest that the additional chemistry increases HONO, ClNO<sub>2</sub>, and ozone and improves model performance. Overall, the article is written clearly and merits publication. However, several issues need to be addressed before publication.

**Response:** Thanks for the encouragement. We have revised our manuscript according to the helpful comments.

(Our replies to the comments are highlighted in blue here, and all changes in the revised manuscript are highlighted in red)

### Specific comments

1. Introduction, line 12-13 While chlorine atoms react with hydrocarbons, the reactions of NO<sub>2</sub> with hydrocarbons are generally negligible. Clarifications are needed.

**Response:** The sentence has been revised into 'ClNO<sub>2</sub> is photolyzed to recycle NO<sub>2</sub> and release reactive chlorine atoms (R4), the latter of which further react with hydrocarbons to produce additional peroxy radicals'

2. Heterogeneous formations, line 16-18 Foley et al. (2010) article does not provide any reaction rates for R5–R7. Correct reference is needed. It will be convenient to readers to include the reaction rates for R5–R7 in this article.

**Response:** As suggested, we have made corrections on the reference and added the reactions rates.

3. Direction emissions, line 20-23 HONO emissions prescribed as 1.6% of NO<sub>2</sub> emissions appear to be too high. Generally, HONO emissions are prescribed as a function of NO<sub>x</sub> emissions. A reference is needed.

**Response:** We checked that we applied an emission ratio of 0.8% (HONO to NO<sub>x</sub>). Corrections have been made and a reference has been added.

4. Model configurations, line 17-19 The Model for Ozone and Related Chemical Tracers likely did not contain any ClNO<sub>2</sub> and/or additional HONO sources. The authors may include a sentence to clarify the issue.

**Response:** As suggested, a sentence has been added to clarify this: ‘Note that the MOZART model does not treat chlorine chemistry nor consider any HONO sources.’

5. Model configurations, line 24-25 The spin-up time of 24 h appears to be too small.

**Response:** Since we used global model simulations as initial and boundary conditions and the lifetimes of those reactive nitrogen compounds are relatively short, we think that a spin-up time of 24 h is acceptable.

6. Emission data, line 3-6 SO<sub>2</sub>, NO<sub>x</sub>, CO, CO<sub>2</sub>, NH<sub>3</sub>, PM<sub>2.5</sub>, PM<sub>10</sub>, BC, OC are not defined anywhere.

**Response:** Definitions of these species have been added as suggested.

7. Spatial and vertical distributions of N<sub>2</sub>O<sub>5</sub> and ClNO<sub>2</sub>, line 30-31 A plot of chloride distribution will be helpful to readers.

**Response:** Very good suggestion. Plots of spatial and vertical distributions of chloride have been added in the supplementary materials (Figure S2).

8. Model performance of HONO and N<sub>2</sub>O<sub>5</sub>/ClNO<sub>2</sub> NO<sub>x</sub> emissions affect HONO, ClNO<sub>2</sub>, as well as O<sub>3</sub> production. Thus, NO<sub>x</sub> emissions are critical for this study. Authors present a qualitative comparison of observed and measured NO<sub>2</sub> in Figure S1. Is it possible to calculate model performance for NO<sub>2</sub> and present a table similar to Table 5?

**Response:** Here we only presented a qualitative for NO<sub>2</sub> because what the MEP monitoring network measured were NO<sub>2</sub>\* instead of real NO<sub>2</sub>. The NO<sub>2</sub> measurements in the MEP’s network, as in regulatory networks of other countries, were made with the catalytic conversion of NO<sub>2</sub> to NO. In addition to NO<sub>2</sub>, the MoO converter would also PAN, HNO<sub>3</sub>, HO<sub>2</sub>NO<sub>2</sub>, HONO, ClNO<sub>2</sub>, etc. into NO, and these interferences would let the instrument “detect” higher NO<sub>2</sub>. So the catalytic method was suggested to overestimate NO<sub>2</sub> by 6%-280%, especially during the photochemically active daytime and in locations away from the sources of emissions.

In order to give a more reliable quantitative comparison, we used the model simulated NO<sub>z</sub> to try to scale down the measured NO<sub>2</sub>\* at each hour by using a factor:  $NO_{2\text{ obs}} = NO_{2\text{ obs}}^* \times$

$\frac{NO_2_{mod}}{NO_2_{mod}+NO_z_{mod}-Nitrate_{mod}}$ . (gas-phase HNO<sub>3</sub> is assumed to be converted into NO by 80% due to its loss on inlet (Xu et al., 2013); other gas-phase NO<sub>z</sub> species are assumed to be converted by 100% in the Mo converter). **Table S1** in the revised supplementary materials lists the comparisons between the simulated and measured (both original and adjusted) NO<sub>2</sub>. The simulations agreed well with the adjusted NO<sub>2</sub> measurements over China, except for the Yangtze River Delta region. The revised **Figure S1** in the supplementary materials also shows the original and scaled measurements of NO<sub>2</sub>.

**Table S1.** Statistics of model performance in the base and ReNOM cases for hourly NO<sub>2</sub> measurements (ppb) at the MEP air quality monitoring stations during the simulation period (27 Jun-7 Jul 2014).

| Region | Case  | No. OBS | OBS <sup>a</sup> | MOD  | COR  | MB   | RMSE | NMB    | NME   |
|--------|-------|---------|------------------|------|------|------|------|--------|-------|
| NCP    | BASE  | 48362   | 19.4             | 18.4 | 0.35 | -1.0 | 16.3 | -5.0%  | 58.6% |
|        | ReNOM |         |                  | 14.4 | 0.35 | -5.0 | 15.8 | -25.8% | 56.3% |
| YRD    | BASE  | 35421   | 17.7             | 27.0 | 0.21 | 9.3  | 23.5 | 52.3%  | 96.9% |
|        | ReNOM |         |                  | 19.2 | 0.17 | 1.4  | 17.9 | 8.1%   | 75.8% |
| PRD    | BASE  | 15651   | 12.1             | 8.3  | 0.38 | -3.9 | 11.9 | -31.8% | 71.5% |
|        | ReNOM |         |                  | 7.2  | 0.35 | -5.0 | 11.5 | -40.8% | 69.7% |
| China  | BASE  | 213308  | 15.6             | 14.2 | 0.32 | -1.4 | 16.3 | -9.2%  | 73.1% |
|        | ReNOM |         |                  | 10.9 | 0.32 | -4.8 | 14.6 | -30.5% | 67.4% |

| Region | Case  | No. OBS | OBS_scaled <sup>a</sup> | MOD  | COR  | MB   | RMSE | NMB    | NME    |
|--------|-------|---------|-------------------------|------|------|------|------|--------|--------|
| NCP    | BASE  | 48362   | 15.6                    | 18.4 | 0.48 | 2.8  | 14.4 | 17.9%  | 62.2%  |
|        | ReNOM |         | 13.5                    | 14.4 | 0.51 | 0.9  | 11.7 | 6.9%   | 57.6%  |
| YRD    | BASE  | 35421   | 14.4                    | 27.0 | 0.37 | 12.6 | 23.3 | 87.3%  | 113.9% |
|        | ReNOM |         | 11.7                    | 19.2 | 0.38 | 7.5  | 16.6 | 64.4%  | 92.7%  |
| PRD    | BASE  | 15651   | 10.0                    | 8.3  | 0.37 | -1.7 | 11.0 | -17.1% | 77.0%  |
|        | ReNOM |         | 8.1                     | 7.2  | 0.42 | -0.9 | 9.1  | -11.5% | 75.3%  |
| China  | BASE  | 213308  | 12.3                    | 14.2 | 0.43 | 1.9  | 14.7 | 15.2%  | 77.6%  |
|        | ReNOM |         | 10.5                    | 10.9 | 0.45 | 0.4  | 11.3 | 3.7%   | 70.7%  |

<sup>a</sup> OBS: original observations of NO<sub>2</sub>; OBS\_scaled: scaled observations of NO<sub>2</sub> based on model simulated reactive nitrogen species by using the equation of  $NO_{2\ obs} = NO_{2\ obs}^* \times$

$\frac{NO_2_{mod}}{NO_2_{mod}+NO_z_{mod}-Nitrate_{mod}}$ , where NO<sub>2</sub>\*<sub>obs</sub> is the original measurement of NO<sub>2</sub>, NO<sub>2</sub><sub>mod</sub> is the model

simulation of NO<sub>2</sub>, NO<sub>z</sub><sub>mod</sub> is the sum of simulations of HONO, 2×N<sub>2</sub>O<sub>5</sub>, ClNO<sub>2</sub>, ClONO<sub>2</sub>, NO<sub>3</sub>, HNO<sub>3</sub>, HNO<sub>4</sub>, PAN, and Nitrate, Nitrate<sub>mod</sub> is the simulated nitrate; gas-phase HNO<sub>3</sub> is assumed to be converted into NO by 80% in the Mo converter due to its possible loss on inlet; other gas-phase NO<sub>z</sub> species are assumed to be converted by 100%.

**9.** Enhancements in regional ROX and O3 levels over polluted regions, line 11-12 ROx is defined in line 12 but used in line 10 prior to defining. It is good to define it at the time of first introduction.

**Response:** Thanks. The definition of ROx has been added in section 3.3.1 when it was introduced for the first time.

**10.** Summary and conclusions, line 1-15 HONO production is related to the prescribed NOx emissions while ClNO<sub>2</sub> production is related to the prescribed NOx and chloride emissions. A very brief discussion on the uncertainty of NOx and chloride emissions is needed.

**Response:** We have added the following brief discussion on the uncertainties of NOx and chlorine emissions as suggested in section 3.2: “Since the emissions of NOx, the main precursor of HONO and N<sub>2</sub>O<sub>5</sub>, are subject to uncertainties in terms of intensity and spatial distribution (e.g. the possible overestimates over the YRD as we discussed) and the chlorine emission provided by the RCEI that we applied in the present study is with large uncertainties due to its relatively low resolution and its temporal coverage being 1990, our model results of HONO and ClNO<sub>2</sub> (and their impacts) are certainly with uncertainties.”

**11.** Summary and conclusions, line 1-8 Simulations were conducted for a 12-day period, not for the entire summer. Thus, it is I suggest adding the first sentence as follows (or something similar it): In this study, we incorporated comprehensive processes of HONO and chlorine chemistry into a new chemical mechanism option, CBMZ\_ReNOM, in the WRF-Chem model and applied the new model to simulating the spatial distribution of HONO, ClNO<sub>2</sub>, and N<sub>2</sub>O<sub>5</sub> and their impact on O<sub>3</sub> in China during the 12-day simulation period in summer.

**Response:** Thank you very much for this suggestion. The sentence has been modified as suggested.

**12.** NCP, YRD, PRD have already been defined earlier; no need to redefine them.

**Response:** The definitions were deleted here.

**13.** Summary and conclusions, line 12-13 Model performance improved at NCP, PRD, and China but deteriorated at YRD (Table 5). Thus, some caveat is needed. Perhaps, the authors may revise the sentence as follows (or something similar): With current emissions estimates, the revised WRF-Chem generally improved O<sub>3</sub> prediction across China.

**Response:** Very good suggestion. We have revised this conclusion sentence as suggested.

**14.** Table 1 It appears that some of the references are not correct. For example, reaction 18 (Cl + NO<sub>2</sub> = ClNO<sub>2</sub> is not included in IUPAC). Please check all references and update as appropriate.

**Response:** Thanks a lot for pointing this out. We have carefully checked all the references we used and made the corrections accordingly. Please refer to the revised Table 1 in the manuscript. The reaction rate for R18 was taken from Tanaka, et al. 2003 (Development of a chlorine mechanism for use in the carbon bond IV chemistry model, *J. Geophys. Res.-Atmos.*, 108, 4145, 10.1029/2002JD002432, 2003).

**15.** It appears that rate constant for reaction 12 ( $\text{ClO} + \text{NO}_2 = \text{ClONO}_2$ ) is not taken from IUPAC. IUPAC recommends a pressure dependent rate constant.

**Response:** It is true that the rate constant for this reaction in IUPAC database is pressure dependent. But we considered that those low-pressure rate coefficients (applicable for pressure ranging from 1.3 to 7 mbar) are not suitable for calculating this reaction in PBL, and thus we applied the preferred high-pressure rate value recommended in IUPAC, which is  $7 \times 10^{-11}$  and is independent of temperature over the range 250-350 K ([http://iupac.pole-ether.fr/htdocs/datasheets/pdf/iClOx32\\_ClO\\_NO2\\_M.pdf](http://iupac.pole-ether.fr/htdocs/datasheets/pdf/iClOx32_ClO_NO2_M.pdf)). This constant rate has been applied in our previous MCM model development study for chlorine chemistry (Xue, L. K. et al., Development of a chlorine chemistry module for the Master Chemical Mechanism, *Geosci. Model Dev.*, 8, 3151-3162, 10.5194/gmd-8-3151-2015, 2015).

**16.** All symbols need to be defined.

**Response:** We have added the definitions of all symbols.

**17.** Figure S2. It will be helpful to readers to define eastern China. Perhaps, the authors can mark “eastern China” in Figure S1 or other figures.

**Response:** Thanks a lot for the suggestion. We now define the eastern China area in Figure S1.
